# Supplementary material for: HMMerThread: Detecting Remote, Functional Conserved Domains in Entire Genomes by Combining Relaxed Sequence-Database Searches with Fold Recognition
Source: PubMed Central journal article supplement (PMC3053371; doi:10.1371/journal.pone.0017568), 2011-03-10

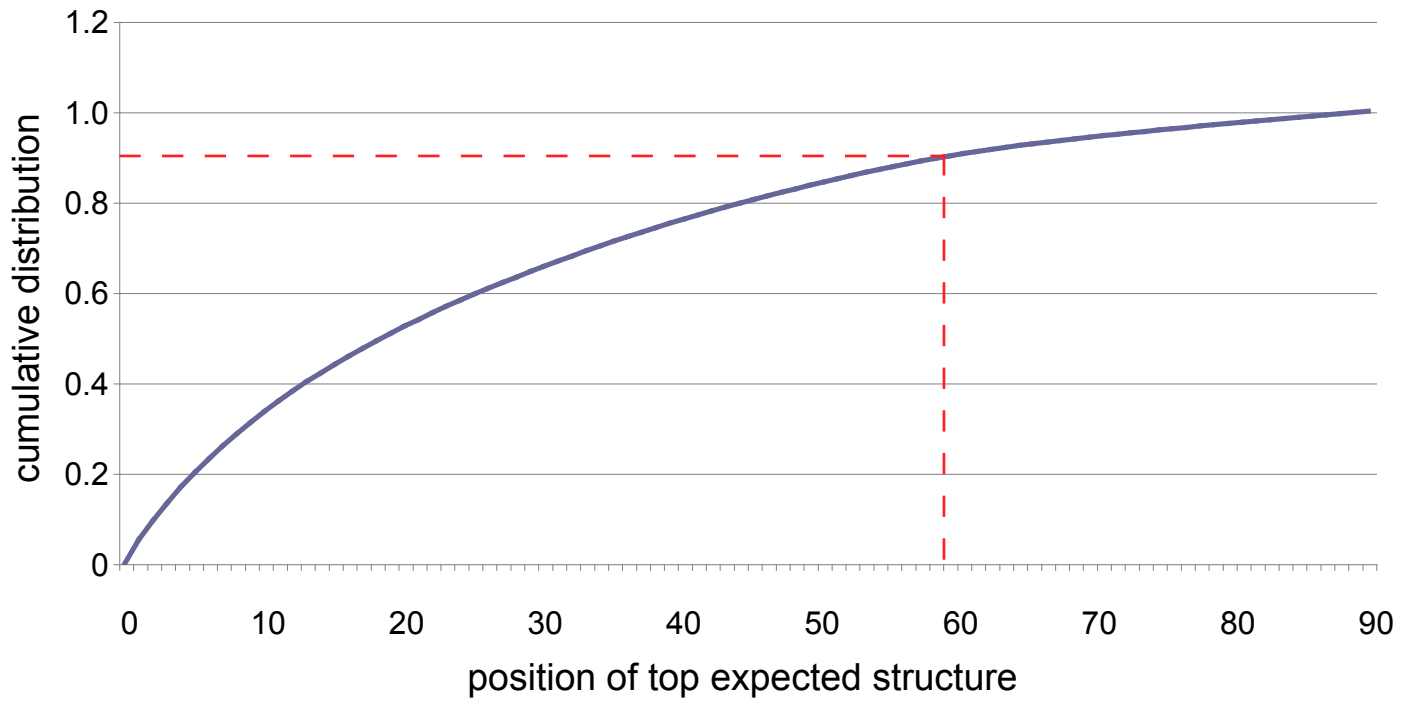

Supplement: pone.0017568.s001.pdf [file pone.0017568.s001.pdf]
