# Supplementary material for: HMMerThread: Detecting Remote, Functional Conserved Domains in Entire Genomes by Combining Relaxed Sequence-Database Searches with Fold Recognition
Source: PubMed Central journal article supplement (PMC3053371; doi:10.1371/journal.pone.0017568), 2011-03-10
Supplement: pone.0017568.s003.pdf [file pone.0017568.s003.pdf]

A

**APPL1**  
NP\_036228.1  
adaptor protein, phosphotyrosine interaction, PH domain and leucine zipper containing 1

**InterPro Domains**

| Pfam Domain | InterPro Domain | HMMEr e-value | PDB ID | SCOP ID | p-value           | Z-Score | Start | End | Top Position | Hits Count |
|-------------|-----------------|---------------|--------|---------|-------------------|---------|-------|-----|--------------|------------|
| PH          | IPR001849       | 5.6e-05       | 1FGY   | 1fgya   | 9.00649664486e-35 | 10.7648 | 278   | 375 | 1            | 45         |
| BAR         | IPR004148       | 1             | 1URU   | 1urua   | 7.26029238822e-06 | 5.39926 | 4     | 224 | 1            | 1          |
| PID         | IPR006020       | 2.7e-07       | 1P3R   | 1p3ra   | 7.52005200536e-18 | 17.0381 | 502   | 633 | 1            | 7          |

**Domain Functions (GO)**

| Pfam Domain | GO ID      | GO Description  |
|-------------|------------|-----------------|
| BAR         | GO:0005515 | protein binding |
| BAR         | GO:0005737 | cytoplasm       |

**HMMEr Alignments**

**BAR**

```

*->lkKqGgffnRasqllkeKvGkaekTkvLDedFeelerrfdttkvlv
+K ++++++T + ++++++
4 IDKL-----PIEETLEDSPTQR-----SLLGVFEEDATAISNYM 37
kklvketkllqppnaarakqkvlklskrqgvkrkgypqPetLLaetm
1 + + + + + + + + + + + + + + + + + + + + + + + + + + + + +
38 NQLYQAMHERYDAQNELSAATH-----LTSKLL 65
qeige...elgdsaedPfGkaLekygeamkqlqlleqldervkqndfP
+e+ + + + + + + + + + + + + + + + + + + + + + + + + + + + +
66 KEYEKqrfPLGDDEV-MSSTLQOFSKVIDELSSCHAVLSTQLADAMMPF 114
ltnllekefkeiqkiklerRrLDyDakrtrlkaktkkskakkDekkl
+t+ e++++kei + + + D Da+ z+ + + + + + + + + + + + + + + + +
115 ITQFKERDLKEILTKEVFQIASNDHDAANRYSRLSKKREND----- 157
akAdqleeElrqAqkqfEelneekeelpnllelevelvng.....lq
+ + + + + + + + + + + + + + + + + + + + + + + + + + + + +
158 -----KVKYEVTEDEVYTRKROHMHYFCALNQLQYKKKIallepLL 201
afweaqldfhqsgaglleqldk-
+ + + + + + + + + + + + + + + + + + + + + + + + + + + + +
202 GYMQAIGSFFKMG---SENLRQLEE 224
    
```

**InterPro Domains**

| Name                               | ID        | Database    | Start/End | External DB    | DB Name   | e-value            |
|------------------------------------|-----------|-------------|-----------|----------------|-----------|--------------------|
| Pfickstein-like                    | IPR001849 | ProteinScan | 177-177   | [25500]        | PH_DOMAIN | 0.0                |
| Phosphotyrosine interaction region | IPR000202 | ProteinScan | 502-638   | [261179]       | PID       | 0.0                |
| Pfickstein homology-type           | IPR011993 | Gene3D      | 261-389   | 5.1D5A.3.20.20 | PH_type   | 6.59998522638E-4   |
| Pfickstein homology-type           | IPR011993 | Gene3D      | 502-629   | 6.1D5A.3.20.20 | PH_type   | 3.4999851489220E-8 |

**CDT Domains**

| Name            | ID   | Database | Start/End | e-value     |
|-----------------|------|----------|-----------|-------------|
| PTB             | 2849 | CD       | 499-627   | 1.99353e-20 |
| PTB             | 4738 | SMART    | 500-636   | 2.60749e-11 |
| CE2-6           | 2922 | CD       | 499-632   | 6.10087e-09 |
| PID             | 3920 | PFAM     | 502-632   | 3.7523e-06  |
| CE2c_ADA1B      | 2916 | CD       | 499-627   | 7.69986e-06 |
| PH_centramin    | 2829 | CD       | 280-372   | 0.000447861 |
| PH              | 817  | PFAM     | 279-375   | 0.00157929  |
| PH              | 4736 | SMART    | 278-376   | 0.00228719  |
| PH_oligophrenin | 2828 | CD       | 314-367   | 0.00020776  |
| HP              | 2980 | CD       | 502-624   | 0.00037834  |
| CDC9205         | 5129 | COG      | 128-222   | 0.013973    |
| PH-like         | 2848 | CD       | 301-373   | 0.0125826   |
| Numb            | 2991 | CD       | 502-633   | 0.0937186   |

**Summary**

The protein encoded by this gene has been shown to be involved in the regulation of cell proliferation, and in the cross-talk between the adiponectin signaling and insulin signaling pathways. The encoded protein binds many other proteins, including RAB5A, DCC, AKT1, PRKCA, adiponectin receptors, and proteins of the NuRD/McCP1 complex. This protein is found associated with endosomal membranes, but can be released by EGF and translocated to the nucleus.

**Associated Literature**

- 18024721 The findings suggest a role for APPL1 and APPL2 protein as dynamic scaffolds that modulate RAB5-associated signaling endosomal membranes by their ability to undergo domain-mediated oligomerization, membrane targeting and phosphotyrosine binding.
- 16623116 APPL1 interacts with adiponectin receptors in mammalian cells and its interaction is stimulated by adiponectin.
- 17845569 These data suggest that APPL1 plays an important role in insulin-stimulated GLUT4 translocation in muscle and adipose tissues and that its N-terminal portion may be critical for APPL1 function.
- 18302781 These findings in APPL1 define a specific cellular site, and disruption of this interaction may play a role in disease.
- 17287464 APPL1 acts as a common downstream effector of Adiponectin receptors R1 and R2, mediating adiponectin-evoked endothelial nitric oxide production and endothelin-dependent vasodilation.
- 17496283 Observational study of gene-disease association. (HUGO Navigator)
- 12816128 The crystal structures of human APPL1 N-terminal BAR-PH domain motif, is reported.
- 17302208 The ability of APPL1 to interact with multiple signaling molecules and phospholipids supports an important role for this adaptor in cell signaling.
- 15303333 Identification of a pathway directly linking the small GTPase RAB5, a key regulator of endocytosis, to signal transduction and mitogenesis via APPL1 and APPL2, two RAB5 effectors.
- 15070827 APPL1 is a potential interactor with FSHR.

**Complete HMMEr Results**

| Pfam Domain       | e-value | Start/End |
|-------------------|---------|-----------|
| PH                | 0.13    | 504-633   |
| BAR               | 1       | 4-224     |
| RBF               | 2.9     | 49-197    |
| CND               | 47      | 602-651   |
| Thymidylate synth | 47      | 84-275    |
| 5_3_exonuc_N      | 49      | 581-662   |

Developed at the MPI/CRG Dresden, Germany. Please mail [bradshaw@mpi-cbg.de](mailto:bradshaw@mpi-cbg.de) for details

B

**APPL1**  
NP\_036228.1  
adaptor protein, phosphotyrosine interaction, PH domain and leucine zipper containing 1

**Validated in:**

**PH\_type**

**PID**

**HMMErThread Hits**

| Pfam Domain | InterPro Domain | HMMEr e-value | PDB ID | SCOP ID | p-value           | Z-Score | Start | End | Top Position | Hits Count |
|-------------|-----------------|---------------|--------|---------|-------------------|---------|-------|-----|--------------|------------|
| PH          | IPR001849       | 5.6e-05       | 1FGY   | 1fgya   | 9.00649664486e-35 | 10.7648 | 278   | 375 | 1            | 45         |
| BAR         | IPR004148       | 1             | 1URU   | 1urua   | 7.26029238822e-06 | 5.39926 | 4     | 224 | 1            | 1          |
| PID         | IPR006020       | 2.7e-07       | 1P3R   | 1p3ra   | 7.52005200536e-18 | 17.0381 | 502   | 633 | 1            | 7          |
