# Supplementary material for: HMMerThread: Detecting Remote, Functional Conserved Domains in Entire Genomes by Combining Relaxed Sequence-Database Searches with Fold Recognition
Source: PubMed Central journal article supplement (PMC3053371; doi:10.1371/journal.pone.0017568), 2011-03-10
Supplement: pone.0017568.s004.pdf [file pone.0017568.s004.pdf]

**Supplemental Table S1: Cross-species validation of remotely conserved domains**

| <b>Primary Species</b>           | <b>Validation Species 1</b>    | <b>Validation Species 2</b>   | <b>Validation Species 3</b> |
|----------------------------------|--------------------------------|-------------------------------|-----------------------------|
| <i>Homo sapiens</i>              | <i>Canis l. familiaris</i>     | <i>Mus musculus</i>           | <i>Gallus gallus</i>        |
| <i>Mus musculus</i>              | <i>Rattus norvegicus</i>       | <i>Homo sapiens</i>           | <i>Gallus gallus</i>        |
| <i>Danio rerio</i>               | <i>Takifug rubripes</i>        | <i>Tetraodon nigroviridis</i> |                             |
| <i>Drosophila melanogaster</i>   | <i>Apis mellifera</i>          | <i>Tribolium castaneum</i>    | <i>Anopheles gambiae</i>    |
| <i>Caenorhabditis elegans</i>    | <i>Caenorhabditis briggsae</i> |                               |                             |
| <i>Dictyostelium discoideum</i>  |                                |                               |                             |
| <i>Schizosaccharomyces pombe</i> |                                |                               |                             |
| <i>Saccharomyces cerevisiae</i>  | <i>Kluyveromyces lactis</i>    | <i>Ashbya gossypii</i>        | <i>Candida albicans</i>     |
