# Supplementary material for: HMMerThread: Detecting Remote, Functional Conserved Domains in Entire Genomes by Combining Relaxed Sequence-Database Searches with Fold Recognition
Source: PLoS One. 2011 Mar 10;6(3):e17568. doi: 10.1371/journal.pone.0017568 (PMC3053371; doi:10.1371/journal.pone.0017568)
Supplement: Table S7 — Accession numbers of sequences used in Figures 3 - 6 . (XLS) [file pone.0017568.s010.xls]

## Sheet: Sheet1
Abbreviation	Species	Accession Number
ScMnd1	S. cerevisiae	NP_011332
SpMcp7	S. pombe	NP_592991
AmMnd1	A. mellifera	XP_624208
HsMnd1	H. sapiens	NP_115493
HsHop2	H. sapiens	NP_057640
AmHop2	A. mellifera	XP_001122181
SpHop2	S. pombe	NP_001018191
ScHop2	S. cerevisiae	NP_011482
HsMih1/Tx	H. sapiens	AAC99850
HsDR6	H. sapiens	NP_055267
MmDR6	M. musculus	NP_848704
MdDR6	M. domestica	XP_001369030
GgDR6	G. gallus	NP_001026274
TgDR6	T. guttata	XP_002189522
DrDR6	D. rerio	NP_001036153
DmCG3967	D. melanogaster	NP_648310
DmCG17003	D. melanogaster	NP_608365
HsLoc79969	H. sapiens	NP_079185
XlLoc735057	X. laevis	NP_001089986
DrLoc406389	D. rerio	NP_998423
CiMGC84976	C. intestinalis	XP_002123997
Ta53139	T. adhaerens	XP_002109274
CeW06B11.1	C. elegans	NP_508981
CeMec-17	C. elegans	NP_501337
GlMec-17	G. lamblia	XP_001706249
Gl117393	G. lamblia	XP_001703863
HsNab1	H. sapiens	NP_005957
HsNab2	H. sapiens	NP_005958
XtNab1	X. tropicalis	NP_001120223
XtNab2	X. tropicalis	NP_001120141
DrNab1	D. rerio	NP_001116745
DrNab2	D. rerio	NP_001107954
DrNab1-_2l	D. rerio	NP_001038551
SpuNab1_2	S. purpuratus	XP_783495
CiNab1_2	C. intestinalis	NP_001071775
DmNab	D. melanogaster	NP_001014557
CeMab-10	C. elegans	NP_496268
ScSsp2	S. cerevisiae	NP_014885
KlSsp2	K. lactis	XP_455593
CaSsp2	C. albicans	XP_714392
DhSsp2	D. hansenii	XP_458210
YlSsp2	Y. lipolytica	XP_502498
PpSsp2	P. pastoris	XP_002493336
HsWapl	H. sapiens	NP_055860
BfWapl	B. floridae	XP_002209983
CiWapl	C. intestinalis	XP_002125417
DmWapl	D. melanogaster	NP_525042
CeWapl-1	C. elegans	NP_500567
TaWapl	T. adhaerens	XP_002112136
MbWapl	M. brevicollis	XP_001748225
SpWpl1	S. pombe	NP_595195
ScRad61/Wpl1	S. cerevisiae	NP_010297
HsAkap10	H. sapiens	NP_009133
XlAkap10	X. laevis	NP_001084758
DrAkap10	D. rerio	XP_695298
SpuAkap10	S. purpuratus	XP_001203361
BfAkap10	B. floridae	XP_002605791
AmAkap10	A. mellifera	XP_001122405
DmPkaap	D. melanogaster	NP_609783
CeRgs5	C. elegans	NP_498229
HsLba	H. sapiens	NP_006717
DrLba	D. rerio	XP_001919808
HsNb	H. sapiens	NP_056493
DrNb	D. rerio	XP_001920727
BfLba	B. floridae	XP_002609145
DmRugose	D. melanogaster	NP_001036261
CeSel2	C. elegans	NP_497939
HsAls2cL	H. sapiens	NP_667340
MdAls2cL	M. domestica	XP_001376259
TgAls2cL	T. guttata	XP_002192109
HsAls1	H. sapiens	NP_065970
GgAls2	G. gallus	XP_421940
DrAls1	D. rerio	XP_001921617
DrAls2	D. rerio	XP_685064
